# Supplementary material for: Health, Wellbeing, and Prognosis of Australian Adolescents with Myalgic Encephalomyelitis/Chronic Fatigue Syndrome (ME/CFS): A Case-Controlled Follow-Up Study
Source: MDPI journal article supplement (doi:10.3390/jcm10163603), 2021-08-16
Supplement: s1 [file s1]

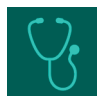

**Supplemental Table S2:** Raw means of measures of health and psychological wellbeing at baseline and follow-up for adolescents with ME/CFS and healthy controls

| Measure                                 | ME/CFS ( <i>n</i> = 17)    | Controls ( <i>n</i> = 17)  |
|-----------------------------------------|----------------------------|----------------------------|
| Fatigue (M (SD); range)                 |                            |                            |
| Baseline                                | 31.21 (17.81; 6.94-61.11)  | 74.51 (9.89; 54.17-93.06)  |
| Follow-up                               | 49.10 (15.29; 20.83-77.78) | 70.67 (12.90; 45.83-94.44) |
| Sleep quality (M (SD); range)<br>(ASWS) |                            |                            |
| Baseline                                | 3.04 (0.58; 1.99-4.04)     | 3.69 (0.46; 2.79-5.54)     |
| Follow-up                               | 3.28 (0.44; 2.33-4.05)     | 3.59 (0.44; 2.68-4.32)     |
| Sleep hygiene (M (SD); range)<br>(ASHS) |                            |                            |
| Baseline                                | 4.60 (0.61; 3.50-5.68)     | 4.75 (0.36; 4.14-5.46)     |
| Follow-up                               | 4.65 (0.42; 3.79-5.36)     | 4.51 (0.36; 4.0-5.25)      |
| Pain (M (SD); range)                    |                            |                            |
| Baseline                                | 41.88 (30.01; 0-77)        | 7.53 (10.42; 0-42)         |
| Follow-up                               | 27.65 (24; 0-64)           | 7.76 (11.26; 0-46)         |
| Anxiety (M (SD); range)                 |                            |                            |
| Baseline                                | 7.76 (4.32; 2-17)          | 3.06 (2.08; 0-7)           |
| Follow-up                               | 4.35 (2.62; 1-9)           | 3.24 (2.70; 0-12)          |
| Depression (M (SD); range)              |                            |                            |
| Baseline                                | 6.53 (5.49; 0-17)          | 4.76 (2.46; 1-9)           |
| Follow-up                               | 6.18 (4.10; 0-13)          | 6.00 (3.95; 1-16)          |
| Health-related QoL (M (SD); range)      |                            |                            |
| Baseline                                | 47.06 (17.65; 17.03-79.06) | 82.78 (10.69; 60.78-98.75) |
| Follow-up                               | 60.25 (16.07; 34.78-82.97) | 77.55 (11.85; 56.56-94.57) |
