# Supplementary material for: Health, Wellbeing, and Prognosis of Australian Adolescents with Myalgic Encephalomyelitis/Chronic Fatigue Syndrome (ME/CFS): A Case-Controlled Follow-Up Study
Source: MDPI journal article supplement (doi:10.3390/jcm10163603), 2021-08-16
Supplement: s1 [file s1]

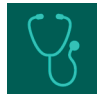

**Supplemental Table S4:** Pearson correlation matrix between health and psychological wellbeing measures and fulfilment of paediatric ME/CFS diagnostic criteria [1, 2].

|                                            |               | Follow-up |               |               |              |            |         |            |        | Fulfilment of ME/CFS criteria at follow-up |
|--------------------------------------------|---------------|-----------|---------------|---------------|--------------|------------|---------|------------|--------|--------------------------------------------|
|                                            |               | Fatigue   | Sleep quality | Sleep hygiene | Current Pain | Worst Pain | Anxiety | Depression | HRQOL  |                                            |
| Baseline                                   | Fatigue       | -0.17     | 0.11          | 0.50*         | -0.30        | -0.28      | -0.51*  | -0.16      | 0.17   | -0.36                                      |
|                                            | Sleep quality | -0.11     | 0.50*         | 0.61*         | -0.61**      | -0.38      | -0.35   | -0.35      | 0.17   | -0.09                                      |
|                                            | Sleep hygiene | 0.36      | 0.33          | 0.81***       | -0.39        | -0.44      | -0.52*  | -0.69**    | 0.48   | 0.19                                       |
|                                            | Current Pain  | -0.10     | -0.51         | -0.52*        | 0.53*        | 0.63**     | 0.33    | -0.17      | -0.54* | 0.55*                                      |
|                                            | Worst Pain    | -0.22     | -0.44         | -0.54*        | 0.58*        | 0.54*      | 0.36    | 0.16       | -0.52* | 0.31                                       |
|                                            | Anxiety       | -0.05     | -0.31         | -0.62**       | 0.66**       | 0.48       | 0.54*   | 0.46       | -0.35  | 0.11                                       |
|                                            | Depression    | -0.09     | -0.30         | -0.71**       | 0.62**       | 0.56*      | 0.47    | 0.53*      | -0.36  | -0.09                                      |
|                                            | HRQOL         | -0.09     | 0.32          | 0.67**        | -0.48        | -0.45      | -0.64** | -0.39      | 0.38   | -0.30                                      |
| Fulfilment of ME/CFS criteria at follow-up |               | -0.05     | -0.34         | -0.36         | 0.05         | 0.17       | 0.34    | -0.25      | -0.35  |                                            |

\* $p < .05$ , \*\* $p < .01$ , \*\*\* $p < .001$ ; HRQOL = Health-related Quality of Life

1. Jason, L., et al., *Examining criteria to diagnose ME/CFS in pediatric samples*. Journal of Behavioral Health and Medicine, 2010. 1(3): p. 186.
2. Jason, L., et al., *A pediatric case definition for myalgic encephalomyelitis and chronic fatigue syndrome*. Journal of Chronic Fatigue Syndrome, 2006. 13(2-3): p. 1-44.
