# Supplementary material for: Health, Wellbeing, and Prognosis of Australian Adolescents with Myalgic Encephalomyelitis/Chronic Fatigue Syndrome (ME/CFS): A Case-Controlled Follow-Up Study
Source: MDPI journal article supplement (doi:10.3390/jcm10163603), 2021-08-16
Supplement: s1 [file s1]

**Supplemental Table S3:** Participants who fulfilled paediatric ME/CFS diagnostic criteria at baseline and follow-up

| Participants                   | P1 | P2 | P3 | P4 | P5 | P6 | P7 | P8 | P9 | P10 | P11 | P12 | P13 | P14 | P15 | P16 | P17 | %, n     |
|--------------------------------|----|----|----|----|----|----|----|----|----|-----|-----|-----|-----|-----|-----|-----|-----|----------|
| <b>Baseline</b>                |    |    |    |    |    |    |    |    |    |     |     |     |     |     |     |     |     |          |
| Fulfilled criteria             | ✓  | ✓  | ✓  | ✓  | ✓  | ✓  | ✓  | ✓  | ✓  | ✓   | ✓   | ✓   | ✓   | ✓   | ✓   | ✓   | ✓   | 100%, 17 |
| Severe                         | ✓  | ✓  | ✓  | ✓  | ✓  |    | ✓  |    | ✓  |     |     |     |     | ✓   | ✓   |     | ✓   | 59%, 10  |
| Moderate                       |    |    |    |    |    | ✓  |    | ✓  |    | ✓   | ✓   | ✓   | ✓   |     |     | ✓   |     | 41%, 7   |
| Atypical                       |    |    |    |    |    |    |    |    |    |     |     |     |     |     |     |     |     | 0%, 0    |
| <b>Follow-up</b>               |    |    |    |    |    |    |    |    |    |     |     |     |     |     |     |     |     |          |
| Fulfilled criteria             | ✓  | ✓  | ✓  |    | ✓  | ✓  | ✓  | ✓  |    | ✓   |     | ✓   | ✓   |     |     |     | ✓   | 65%, 11  |
| Severe                         |    |    |    |    |    |    |    | ✓  |    | ✓   |     | ✓   |     |     |     |     | ✓   | 24%, 4   |
| Moderate                       |    | ✓  |    |    | ✓  |    |    |    |    |     |     |     | ✓   |     |     |     |     | 18%, 3   |
| Atypical                       | ✓  |    | ✓  |    |    | ✓  | ✓  |    |    |     |     |     |     |     |     |     |     | 24%, 4   |
| Did not fulfil criteria        |    |    |    | ✓  |    |    |    |    | ✓  |     | ✓   |     |     | ✓   | ✓   | ✓   |     | 35%, 6   |
| Self-reported as having ME/CFS | ✓  | ✓  | ✓  | ✓  | ✓  | ✓  | ✓  | ✓  |    | ✓   |     | ✓   | ✓   |     | ✓   | ✓   | ✓   | 82%, 14  |

**Note:** ‘Severe’ (6 out of 6 criteria), ‘moderate’ (5 out of 6 criteria), ‘atypical’ (2-4 criteria) classifications based on the classic six paediatric ME/CFS case definition symptom criteria which must be experienced for more than three months at baseline and follow-up: (1) unexplained, persistent fatigue that is unrelated to exertion and not alleviated by rest, and represents a substantial reduction in previous functioning (criterion 1A, B, C), (2) post-exertional malaise (criterion 2), (3) sleep problems (criterion 3), (4) pain (criterion 4), (5) two or more neurocognitive problems (criterion 5), and (6) autonomic, immune, and/or neuroendocrine problems (criterion 6) [1, 2]

1. Jason, L., et al., *Examining criteria to diagnose ME/CFS in pediatric samples*. Journal of Behavioral Health and Medicine, 2010. 1(3): p. 186.
2. Jason, L., et al., *The Development of a Revised Canadian Myalgic Encephalomyelitis Chronic Fatigue Syndrome Case Definition*. American Journal of Biochemistry and Biotechnology, 2010. 6(2).
