# Supplementary material for: Health, Wellbeing, and Prognosis of Australian Adolescents with Myalgic Encephalomyelitis/Chronic Fatigue Syndrome (ME/CFS): A Case-Controlled Follow-Up Study
Source: J Clin Med. 2021 Aug 16;10(16):3603. doi: 10.3390/jcm10163603 (PMC8396969; doi:10.3390/jcm10163603)
Supplement: Supplementary file 1 [file jcm-10-03603-s001.zip]

Archive with 4 entries (4 files):
- Josev_Supplementary Table S1.pdf
- Josev_Supplementary Table S2.pdf
- Josev_Supplementary Table S3.pdf
- Josev_Supplementary Table S4.pdf
